# Supplementary material for: Climate Change Increases the Expansion Risk of Helicoverpa zea in China According to Potential Geographical Distribution Estimation
Source: MDPI journal article supplement (doi:10.3390/insects13010079), 2022-01-11
Supplement: s1 [file s1]

# Supplementary Materials

**Table S1** AUC values of the MaxEnt model results for different years

| period \ | current | 2030s    | 2050s    | 2030s    | 2050s    | 2030s    | 2050s    |
|----------|---------|----------|----------|----------|----------|----------|----------|
|          |         | SSP1-2.6 | SSP1-2.6 | SSP2-4.5 | SSP2-4.5 | SSP5-8.5 | SSP5-8.5 |
| AUC      | 0.892   | 0.895    | 0.893    | 0.896    | 0.919    | 0.894    | 0.894    |
| Stddev   | 0.002   | 0.001    | 0.003    | 0.003    | 0.001    | 0.004    | 0.003    |

**Table S2** Suitable habitat areas for *Helicoverpa zea* under current conditions and different climate change scenarios (10<sup>4</sup> km<sup>2</sup>)

| Period          | Poorly<br>suitable<br>habitat | moderately<br>suitable<br>habitat | highly<br>suitable<br>habitat | total<br>suitable<br>habitat |
|-----------------|-------------------------------|-----------------------------------|-------------------------------|------------------------------|
| current         | 321.44                        | 93.45                             | 3.26                          | 418.15                       |
| 2030s, SSP1-2.6 | 301.3                         | 88.01                             | 5.97                          | 395.28                       |
| 2050s, SSP1-2.6 | 346.59                        | 91.76                             | 25.39                         | 463.74                       |
| 2030s, SSP2-4.5 | 303.48                        | 89.38                             | 4.58                          | 397.44                       |
| 2050s, SSP2-4.5 | 298.76                        | 63.5                              | 18.19                         | 380.45                       |
| 2030s, SSP5-8.5 | 295.1                         | 88.4                              | 5.43                          | 388.93                       |
| 2050s, SSP5-8.5 | 318.34                        | 89.91                             | 16.88                         | 425.13                       |

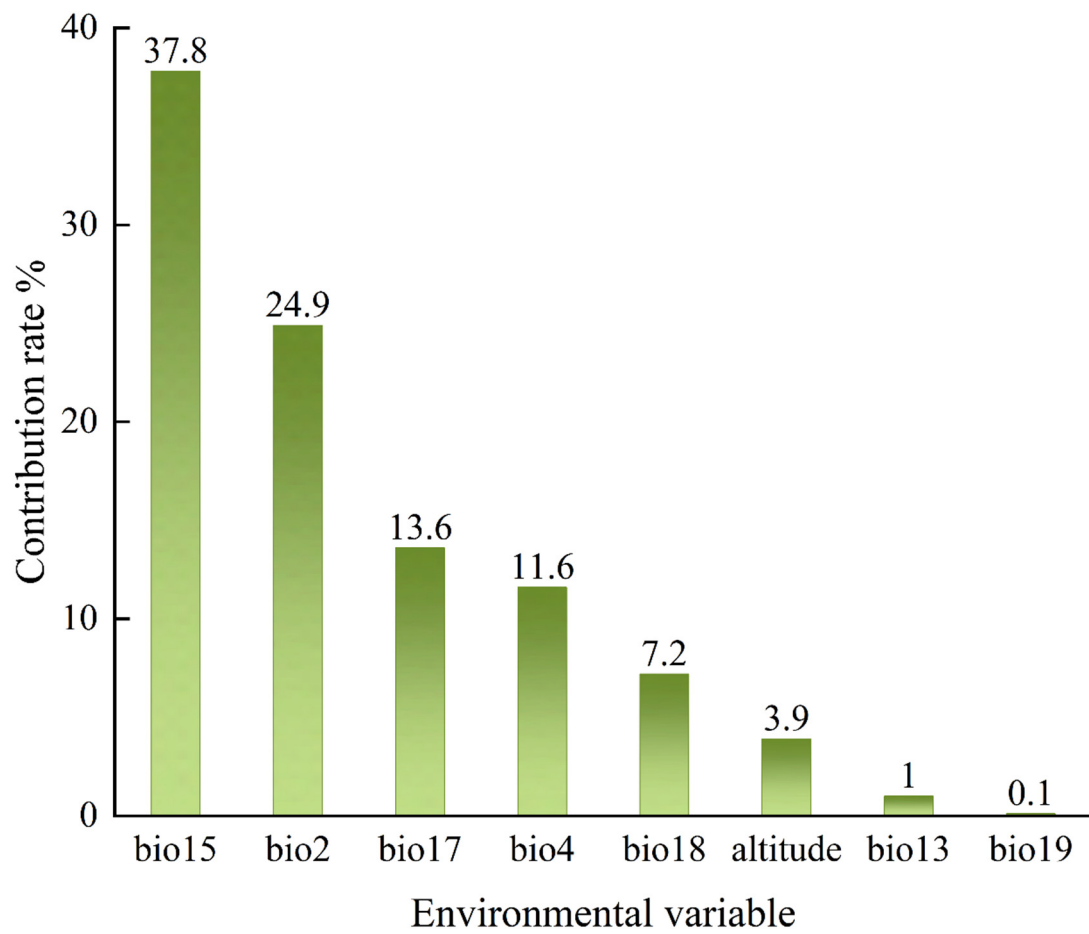

**Figure S1.** Influence of percentage contribution provided by 8 environmental variables based on the MaxEnt model.

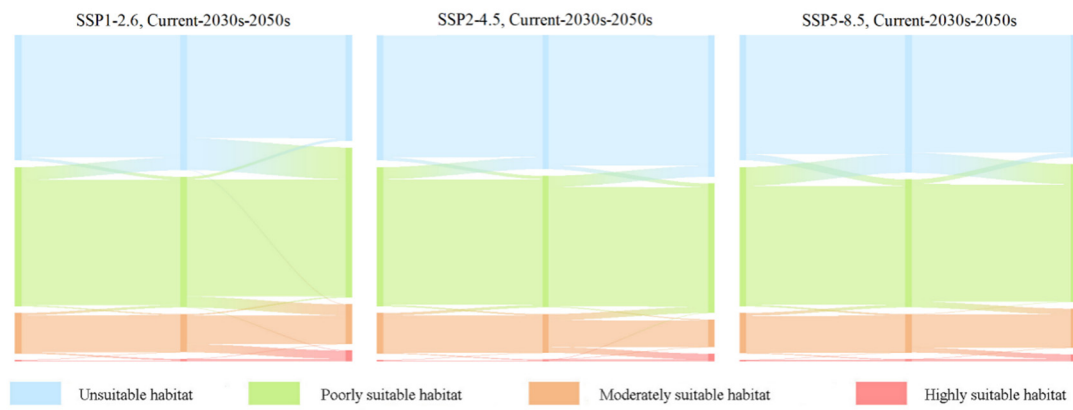

**Figure S2.** Area conversion between potential suitable habitats of *Helicoverpa zea* under current climate and project climate changes.
